# Supplementary material for: Identification of key genes and validation of key gene aquaporin 1 on Wilms’ tumor metastasis
Source: PeerJ. 2023 Oct 26;11:e16025. doi: 10.7717/peerj.16025 (PMC10613441; doi:10.7717/peerj.16025)
Supplement: Supplemental Information 9 — Values are 2−ΔΔ Ct. [file peerj-11-16025-s009.xlsx]

## Sheet: 5 key genes mRNA expression
Relative mRNA expression levels of REN, NPHS2, SLC12A3, SLC12A1, and AQP; values are 2^-ΔΔCt.
Top 5 key genes	HK2 cells	HK2 cells	HK2 cells	Wit-49 cells	Wit-49 cells	Wit-49 cells
REN	1.9816	0.795537	0.634343	0.118257	0.294567	0.36942
NPHS2	1.14608	1.41583	0.616274	0.210457	0.170361	0.391387
SLC12A3	1.11385	0.79309	1.13201	0.244291	0.343092	0.240371
SLC12A1	0.492357	0.992328	2.01546	0.51883	0.25349	0.126745
AQP1	0.668965	1.59107	0.939522	0.394108	0.165702	0.280616
